# Supplementary material for: Non-Invasive Risk Prediction Based on Right Ventricular Function in Patients with Pulmonary Arterial Hypertension
Source: MDPI journal article supplement (doi:10.3390/jcm10215130), 2021-10-31
Supplement: s1 [file s1]

## Supplementary Material

**Table S1:** Missing values of the overall study population

|                                | Missing value (N) |
|--------------------------------|-------------------|
| Age                            | 0/254             |
| Sex                            | 0/254             |
| PAH etiology                   | 3/254             |
| Systolic BP                    | 5/254             |
| Diastolic BP                   | 5/254             |
| Heart rate                     | 4/254             |
| BMI                            | 1/254             |
| WHO FC                         | 1/254             |
| 6MWD                           | 6/254             |
| FVC                            | 22/254            |
| DLCO                           | 60/254            |
| NT-proBNP                      | 3/254             |
| Serum creatinine               | 5/254             |
| eGFR                           | 5/254             |
| Phosphodiesterase 5 inhibitor  | 0/254             |
| Endothelin receptor antagonist | 0/254             |
| Prostacyclin agonist           | 0/254             |
| Arterial hypertension          | 5/254             |
| Diabetes                       | 5/254             |
| Coronary artery disease        | 5/254             |
| Peripheral artery disease      | 5/254             |
| RA area                        | 15/254            |
| RV base                        | 18/254            |
| RV medial                      | 20/254            |
| RV longitudinal                | 20/254            |
| Peak tricuspid velocity        | 54/254            |
| VCI diameter                   | 65/254            |
| Pericardial effusion           | 13/254            |
| FAC                            | 48/254            |
| TAPSE                          | 23/254            |
| RV strain free wall            | 113/254           |

Abbreviations: PAH = pulmonary arterial hypertension, BP = blood pressure, BMI = body-mass-index, FC = functional class, 6MWD = 6-minute walk distance, FVC = forced vital capacity, DLCO = diffusing capacity of the lungs for carbon monoxide, NT-proBNP = N-terminal-pro hormone brain peptide, eGFR = estimated glomerular filtration rate, RA = right atrial, RV = right ventricular, VCI = vena cava inferior, FAC = fractional area change, TAPSE = tricuspid annular plane systolic excursion.

**Table S2:** Comparison between expert recommended and generated cut-offs for survival analysis (univariate). ROC analysis at year 5. C-Index is bootstrap corrected (B=1000).

|                      | Cut-off | Sens (%) | Spec (%) | PPV (%) | NPV (%) | C-Index |
|----------------------|---------|----------|----------|---------|---------|---------|
| NT-proBNP Calculated | 2288    | 60.95    | 75       | 58.29   | 77.02   | 0.62    |
| NT-proBNP Expert     | 300     | 91.55    | 32.81    | 43.85   | 87.14   | 0.58    |
| 6MWD Calculated      | 320     | 38.56    | 39.06    | 26.99   | 52.12   | 0.6     |
| 6MWD Expert          | 440     | 8.72     | 75       | 16.93   | 58.45   | 0.57    |
| RA area Calculated   | 26      | 47.34    | 72.13    | 45.24   | 73.79   | 0.58    |
| RA area Expert       | 18      | 86.18    | 24.59    | 35.73   | 78.54   | 0.55    |
| TAPSE Calculated     | 17      | 29.09    | 45.9     | 20.89   | 56.85   | 0.63    |
| TAPSE Expert         | 18      | 21.62    | 52.46    | 18.26   | 57.67   | 0.62    |
| FAC Calculated       | 28      | 38.22    | 62.5     | 30.84   | 69.8    | 0.57    |
| FAC Expert           | 35      | 15.31    | 78.57    | 23.82   | 67.95   | 0.54    |

Abbreviations: Sens = Sensitivity, Spec = Specificity, PPV = positive predictive value, NPV = negative predictive value, NT-proBNP = N-terminal-pro hormone brain peptide, 6MWD = 6-minute walk distance, RA = right atrial, TAPSE = tricuspid annular plane systolic excursion, FAC = fractional area change.

**Table S3:** Multivariable Cox regression models predicting all-cause mortality and lung transplantation shown as sensitivity analyses adjusting for all significant clinical variables

|                                   | Model 3            |                       |              | Model 4            |                       |              |
|-----------------------------------|--------------------|-----------------------|--------------|--------------------|-----------------------|--------------|
|                                   | HR (95% CI)        | HR per SD<br>(95% CI) | p-value      | HR (95% CI)        | HR per SD<br>(95% CI) | p-value      |
| WHO FC I/II                       | 1 (reference)      |                       |              | 1 (reference)      |                       |              |
| WHO FC III                        | 0.89 (0.35, 2.24)  | 0.95 (0.61, 1.46)     | 0.805        | 0.69 (0.21, 2.25)  | 0.85 (0.50, 1.44)     | 0.538        |
| WHO FC IV                         | 1.39 (0.46, 4.17)  | 1.12 (0.76, 1.65)     | 0.556        | 0.70 (0.15, 3.26)  | 0.90 (0.56, 1.44)     | 0.654        |
| NT-proBNP >300pg/mL               | 1.34 (0.57, 3.17)  | 1.13 (0.79, 1.60)     | 0.503        | 1.34 (0.50, 3.64)  | 1.13 (0.75, 1.69)     | 0.561        |
| 6MWD <440m                        | 1.78 (0.73, 4.35)  | 1.24 (0.89, 1.72)     | 0.206        | 1.22 (0.47, 3.19)  | 1.08 (0.75, 1.54)     | 0.682        |
| RA area >18cm <sup>2</sup>        | 1.32 (0.56, 3.15)  | 1.12 (0.79, 1.60)     | 0.526        | 2.93 (0.87, 9.90)  | 1.55 (0.94, 2.54)     | 0.083        |
| Pericardial effusion              | 1.58 (0.54, 4.60)  | 1.12 (0.86, 1.44)     | 0.399        | 2.24 (0.70, 7.21)  | 1.22 (0.91, 1.64)     | 0.175        |
| TAPSE <18mm                       | 2.32 (1.27, 4.27)  | 1.53 (1.13, 2.07)     | <b>0.006</b> | 2.70 (1.29, 5.65)  | 1.64 (1.13, 2.38)     | <b>0.009</b> |
| FAC <35%                          | 1.68 (0.71, 4.00)  | 1.25 (0.86, 1.80)     | 0.240        | 1.09 (0.40, 2.95)  | 1.04 (0.68, 1.58)     | 0.870        |
| eGFR <60mL/min/1.73m <sup>2</sup> | 1.70 (0.95, 3.05)  | 1.30 (0.98, 1.72)     | 0.073        | 2.12 (1.05, 4.29)  | 1.45 (1.02, 2.05)     | <b>0.036</b> |
| Systolic BP <110mmHg              | 1.52 (0.78, 2.96)  | 1.18 (0.91, 1.54)     | 0.219        | 1.96 (0.89, 4.32)  | 1.30 (0.95, 1.76)     | 0.096        |
| DLCO <40%                         |                    |                       |              | 2.83 (1.25, 6.40)  | 1.56 (1.10, 2.20)     | <b>0.013</b> |
| N                                 | 182                |                       |              | 149                |                       |              |
| N events                          | 52                 |                       |              | 39                 |                       |              |
| C-Index                           | 0.659 <sup>#</sup> |                       |              | 0.667 <sup>*</sup> |                       |              |

Model 3: includes established parameters (WHO functional class, NT-proBNP, 6MWD, RA area, pericardial effusion), additional echocardiographic variables (TAPSE, FAC) and clinical and laboratory variables (systolic BP and eGFR)

Model 4: includes predictors from Model 3 and the pulmonary function testing variable DLCO

<sup>#</sup>p-value when compared to Model 2 = 0.58, <sup>\*</sup>p-value when compared to Model 2 = 0.52, Abbreviations: HR = Hazard Ratio, CI = confidence interval, SD = Standard deviation, FC = functional class, NT-proBNP = N-terminal-pro hormone brain peptide, 6MWD = 6-minute walk distance, RA = right atrial, TAPSE = tricuspid annular plane systolic excursion, FAC = fractional area change, eGFR = estimated glomerular filtration rate, BP = blood pressure, DLCO = diffusing capacity of the lungs for carbon monoxide.
